# Supplementary material
Source: PubMed Central journal article supplement (PMC6129251)
Supplement: 12264_2018_233_MOESM1_ESM.pdf [file 12264_2018_233_MOESM1_ESM.pdf]

## Supplementary Material

### Lack of Association between *DNMT3B* Polymorphisms and Sporadic Parkinson's Disease in a Han Chinese Population

Hong Pan<sup>1,2,#</sup>, Jun-Yi Shen<sup>2,#</sup>, Juan-Juan Du<sup>2</sup>, Shi-Shuang Cui<sup>2</sup>, Jin Liu<sup>2</sup>, Yi-Qi Lin<sup>2</sup>, Yi-Xi He<sup>2</sup>, Yang Fu<sup>2</sup>, Chao Gao<sup>2</sup>, Gen Li<sup>2</sup>, Sheng-Di Chen<sup>2\*</sup>, Jian-Fang Ma<sup>2\*</sup>

#### Materials and Methods

##### Participants

The diagnosis of PD patients was based on the UK Brain Bank criteria <sup>[1]</sup>. Controls were recruited from a community, and examined by a movement disorder specialist for exclusion of neurodegenerative diseases, malignant tumors, and auto-immune diseases. All the PD cases and controls were Han Chinese and signed consent forms. This study was approved by the Ethics Committee of Ruijin Hospital affiliated to Shanghai Jiao Tong University School of Medicine [2011 No.13].

##### Genotyping

Genomic DNA was extracted from the peripheral venous blood of PD patients and controls using the classical phenol-chloroform-isopropyl alcohol method <sup>[2]</sup>. Primers were designed using Primer-BLAST (<https://www.ncbi.nlm.nih.gov/tools/primer-blast/>) and synthesized by BioSune biotechnology (Shanghai) Co., Ltd., Shanghai, China. Sequencing results were analyzed with SeqMan in DNASTAR Lasergene package, version 7.1.0 (DNASTAR, Inc.). Details of the primers are available in Table S5.

##### Statistics

Student *t*-test was used to compare age between PD and control groups. Gender differences were assessed using the  $\chi^2$  test. Hardy-Weinberg equilibrium was tested by the  $\chi^2$  test or Fisher's exact test. Risk analysis was carried out using a logistic regression model. Odds ratios were calculated with 95% confidence intervals for each SNP according to allelic association, the dominant model, and the recessive model. The statistical analyses were conducted using R, version

3.4.1 (R Core Team, <https://www.R-project.org>), and RStudio Desktop, version 1.0.153, (RStudio, Inc. Boston, MA). Logistic regression was performed in SPSS, version 21.0.0 (IBM Corporation). The power effect was calculated using PS Power and Sample Size Calculations, version 3.1.2 (Dupont WD, Plummer)<sup>[3,4]</sup>. Linkage disequilibrium was analyzed by HaploView, version 4.2 (Daly Lab at the Broad Institute, Cambridge, MA).

### **Meta-analysis**

We searched PubMed, Web of Science, Cochrane Library, and EMBASE, and found only one study investigating the association between rs2424913 on *DNMT3B* and PD in an Asian population. STATA SE, version 12.0 (StataCorp) was applied in the meta-analysis. A fixed effect model was chosen because no heterogeneity was found ( $I^2 < 50\%$ ). Forest plots were drawn in Review Manager (RevMan), version 5.3.5 (The Nordic Cochrane Centre, The Cochrane Collaboration, Copenhagen).

**Table S1. Demographic information in this study.**

|                              | PD<br>( <i>n</i> = 249) | Control<br>( <i>n</i> = 239) | <i>P</i> |
|------------------------------|-------------------------|------------------------------|----------|
| Age (years, mean ± SD)       | 63.97±11.02             | 64.75±10.72                  | 0.425    |
| Female/male                  | 124/125                 | 115/124                      | 0.779    |
| Onset age (years, mean ± SD) | 56.29±11.12             | -                            | -        |

PD, Parkinson's disease; SD, standard deviation.

**Table S2. Association of candidate SNPs with PD risk.**

| Gene             | SNP_ID      | HWE p | PD    | HC        | Power | Allele |          |      | Additive model |          |      | Dominant Model |          |      | Recessive model |          |      |           |
|------------------|-------------|-------|-------|-----------|-------|--------|----------|------|----------------|----------|------|----------------|----------|------|-----------------|----------|------|-----------|
|                  |             |       | MAF   | MAF       |       | minor  | <i>P</i> | OR   | 95%            | <i>P</i> | OR   | 95%            | <i>P</i> | OR   | 95%             | <i>P</i> | OR   | 95%       |
|                  |             |       | (%)   | (%)       |       | allele |          |      | CI             |          |      | CI             |          |      | CI              |          |      | CI        |
| <i>RAD51B</i>    | rs34094401  | -     | 0.00  | 0.00      | -     | G      | -        | -    | -              | -        | -    | -              | -        | -    | -               | -        | -    | -         |
| <i>CPXMI</i>     | rs41309351  | -     | 0.00  | 0.00      | -     | A      | -        | -    | -              | -        | -    | -              | -        | -    | -               | -        | -    | -         |
| <i>SERPINA1</i>  | rs141620200 | -     | 0.00  | 0.00      | -     | A      | -        | -    | -              | -        | -    | -              | -        | -    | -               | -        | -    | -         |
| <i>MPHOSPH10</i> | rs143555311 | -     | 0.00  | 0.00      | -     | G      | -        | -    | -              | -        | -    | -              | -        | -    | -               | -        | -    | -         |
| <i>MPHOSPH10</i> | rs9941620   | 0.886 | 27.11 | 30.7<br>5 | 0.23  | G      | 0.200    | 0.83 | 0.62-1.11      | 0.218    | 0.84 | 0.64-1.11      | 0.239    | 0.80 | 0.55-1.16       | 0.519    | 0.78 | 0.39-1.54 |
| <i>DNMT3B</i>    | rs2424913   | 1.000 | 0.40  | 0.84      | 0.07  | C      | 0.443    | 0.48 | 0.04-3.35      | 0.394    | 0.48 | 0.09-2.62      | 0.443    | 0.48 | 0.04-3.36       | 1.000    | 0.00 | -.        |
| <i>DNMT3B</i>    | rs75826787  | 0.915 | 5.22  | 4.81      | 0.06  | T      | 0.884    | 1.09 | 0.59-2.03      | 0.799    | 1.10 | 0.61-1.98      | 0.880    | 1.10 | 0.58-2.08       | 1.000    | 0.00 | -.        |

HWE p, *P* value of Hardy-Weinberg equilibrium; MAF, minor allele frequency of the SNP; PD, Parkinson's disease; HC, healthy control; OR, odds ratio; 95% CI, 95% confidence interval.

**Table S3. Linkage disequilibrium (LD) of two SNPs on chromosome 20.**

| Locus 1    | Locus 2   | D' | LOD  | $r^2$ | 95% CI    | Dist (bp) |
|------------|-----------|----|------|-------|-----------|-----------|
| rs75826787 | rs2424913 | 1  | 0.13 | 0     | 0.04-0.97 | 93        |

D', normalized coefficient of LD between the two loci; LOD, log of the likelihood odds ratio, a measure of confidence in the value of D';  $r^2$ , correlation coefficient between the loci; 95% CI, confidence interval of D'; Dist, distance (in base pairs) between the loci.

**Table S4. Meta-analysis of SNPs of rs2424913 *DNMT3B* in a Chinese Population.**

| GENE          | SNP_ID    | Power | gender | Allele |       | Dominant Model |           |       |       |      |           |
|---------------|-----------|-------|--------|--------|-------|----------------|-----------|-------|-------|------|-----------|
|               |           |       |        | $I^2$  | $P$   | OR             | 95% CI    | $I^2$ | $P$   | OR   | 95% CI    |
|               |           | 0.09  | total  | 0      | 0.419 | 0.65           | 0.23-1.84 | 0     | 0.420 | 0.65 | 0.23-1.84 |
| <i>DNMT3B</i> | rs2424913 | 0.17  | female | 0      | 0.321 | 0.50           | 0.12-1.98 | 0     | 0.319 | 0.49 | 0.12-1.98 |
|               |           | 0.05  | male   | 0      | 0.968 | 0.97           | 0.20-4.81 | 0     | 0.968 | 0.97 | 0.19-4.83 |

OR, odds ratio; 95% CI, 95% confidence interval.

**Table S5. Primers amplifying the candidate SNPs.**

| Gene             | SNP                        | Primer type | Primer sequences (5'→3')     | Product (bp) |
|------------------|----------------------------|-------------|------------------------------|--------------|
| <i>RAD51B</i>    | rs34094401                 | Forward     | GCTTTGAGGCCAGAATTCAGTGTT     | 1216         |
|                  |                            | Reverse     | TGCTGTTTTAAGCTACTAAACTGTGAG  |              |
| <i>CPXMI</i>     | rs41309351                 | Forward     | GGGACACTTCAGAGTGGGAACA       | 889          |
|                  |                            | Reverse     | TTCTGCTCCTGATGCAGTTCCT       |              |
| <i>MPHOSPH10</i> | rs143555311<br>& rs9941620 | Forward     | GTTCCAGTTGGTCTTATAATTTTGTGGT | 983          |
|                  |                            | Reverse     | CCGCATCATCTGGTAAAGCAAA       |              |
| <i>SERPINA1</i>  | rs141620200                | Forward     | CTTTGCTGTTTGACCACGTCCC       | 694          |
|                  |                            | Reverse     | TAAACGGTTGTCACTGGGCACT       |              |
| <i>DNMT3B</i>    | rs2424913 & rs75826787     | Forward     | CATTCAGCTGGCCATGTCTGTCT      | 634          |
|                  |                            | Reverse     | AGGGAAAGCTTCCATTCCCAACA      |              |

Rs143555311 and rs9941620 shared amplifying primers; Rs75826787 and rs2424913 also shared amplifying primers.

### A Allelic association in total:

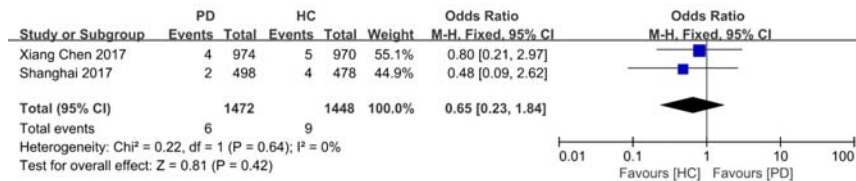

### B Allelic association in females:

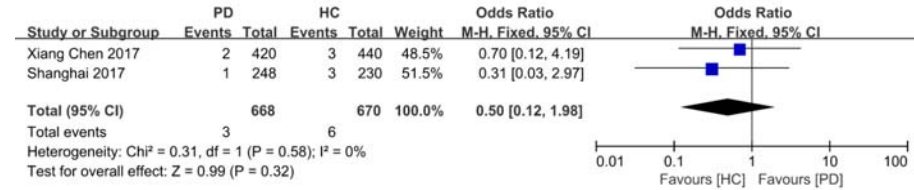

### C Allelic association in males:

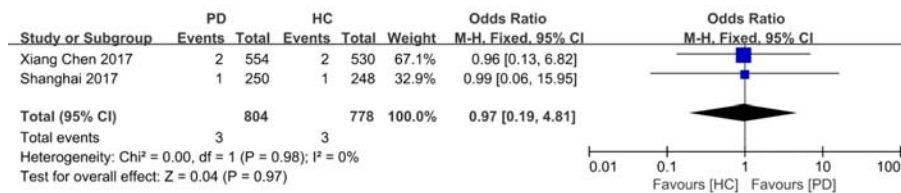

### D Dominant model of genotype in total:

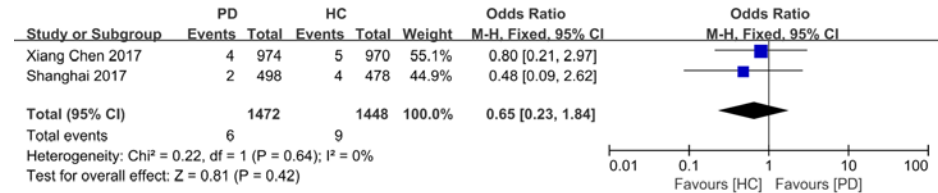

### E Dominant model of genotype in females:

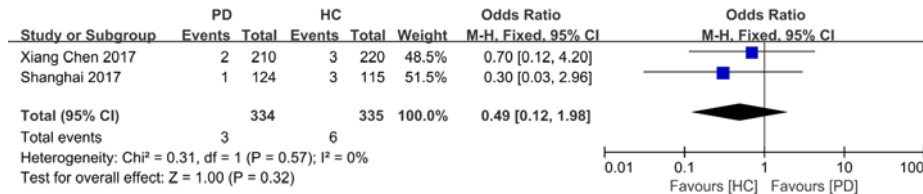

### F Dominant model of genotype in males:

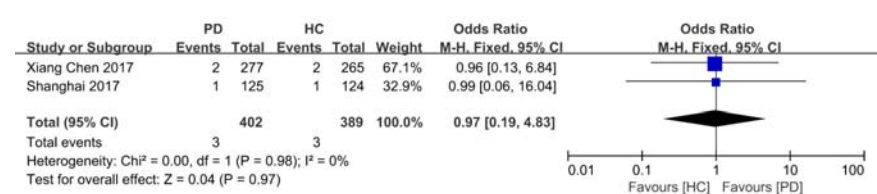

**Fig. S1.** Meta-analysis of rs2424913 *DNMT3B*. A fixed effect model was applied. Xiang Chen, the study of Xiang Chen et al.<sup>[5]</sup>; Shanghai, our study; OR, odds ratio; 95% CI, 95% confidence interval.

## References

- [1] Hughes AJ, Daniel SE, Kilford L, Lees AJ. Accuracy of clinical diagnosis of idiopathic Parkinson's disease: a clinico-pathological study of 100 cases. *J Neurol Neurosurg Psychiatry* 1992, 55: 181-184.
- [2] Ahmad NN, Cu-Unjieng AB, Donoso LA. Modification of standard proteinase K/phenol method for DNA isolation to improve yield and purity from frozen blood. *J Med Genet* 1995, 32: 129-130.
- [3] Dupont WD, Plummer WD, Jr. Power and sample size calculations for studies involving linear regression. *Control Clin Trials* 1998, 19: 589-601.
- [4] Dupont WD, Plummer WD, Jr. Power and sample size calculations. A review and computer program. *Control Clin Trials* 1990, 11: 116-128.
- [5] Chen X, Xiao Y, Wei L, Wu Y, Lu J, Guo W, et al. Association of DNMT3b gene variants with sporadic Parkinson's disease in a Chinese Han population. *J Gene Med* 2017, 19: 360-365
